# Supplementary material
Source: PubMed Central journal article supplement (PMC1564206)
Supplement: pnas_0605814103_8.pdf [file pnas_0605814103_8.pdf]

**Table 1. Total reduced glutathione and oxidized glutathione content in NSC-34 cell lines expressing mutant SOD1s or wild-type SOD1**

|             | SOD1 protein | Total GSH content<br>(nmoli/mg protein) | Total GSSG content<br>(nmoli/mg protein) |
|-------------|--------------|-----------------------------------------|------------------------------------------|
|             | WT-Doxy      | 87.00 ± 8.8                             | ND                                       |
|             | WT+Doxy      | 99.00 ± 8.3                             | ND                                       |
|             | G93A-Doxy    | 84.00 ± 10.7                            | ND                                       |
|             | G93A+Doxy    | 88.00 ± 5.3                             | ND                                       |
| hSOD1-myc   | WT -Doxy     | 74.00 ± 10.6                            | ND                                       |
|             | WT +Doxy     | 77.09 ± 9.8                             | ND                                       |
|             | A4V -Doxy    | 98.33 ± 9.3                             | ND                                       |
|             | A4V +Doxy    | 89.23 ± 11.9                            | ND                                       |
|             | G37R -Doxy   | 106.34 ± 10.7                           | ND                                       |
|             | G37R +Doxy   | 109.87 ± 14.8                           | ND                                       |
|             | H46R -Doxy   | 96.00 ± 13.0                            | ND                                       |
|             | H46R +Doxy   | 88.67 ± 15.8                            | ND                                       |
|             | H48Q -Doxy   | 88.65 ± 7.9                             | 1.10 ± 0.5                               |
|             | H48Q +Doxy   | 97.44 ± 10.2                            | 1.60 ± 0.4                               |
|             | H80R -Doxy   | 89.11 ± 12.6                            | ND                                       |
|             | H80R +Doxy   | 96.23 ± 11.3                            | ND                                       |
|             | G85R -Doxy   | 98.44 ± 10.8                            | ND                                       |
|             | G85R +Doxy   | 104.32 ± 11.8                           | ND                                       |
|             | D90A -Doxy   | 87.31 ± 5.9                             | ND                                       |
|             | D90A +Doxy   | 97.77 ± 3.4                             | ND                                       |
|             | G93A -Doxy   | 82.09 ± 8.9                             | ND                                       |
|             | G93A +Doxy   | 79.08 ± 7.2                             | ND                                       |
|             | D124V -Doxy  | 78.86 ± 4.9                             | ND                                       |
|             | D124V +Doxy  | 90.44 ± 9.7                             | ND                                       |
|             | D125H -Doxy  | 89.42 ± 7.9                             | ND                                       |
|             | D125H +Doxy  | 94.23 ± 9.5                             | ND                                       |
|             | E133Δ -Doxy  | 112.27 ± 14.5                           | ND                                       |
|             | E133Δ +Doxy  | 105.66 ± 16.7                           | ND                                       |
| S134N -Doxy | 77.65 ± 9.9  | ND                                      |                                          |
| S134N +Doxy | 87.62 ± 7.0  | ND                                      |                                          |

ND, not detectable.
