# Supplementary material
Source: PubMed Central journal article supplement (PMC1564206)
Supplement: pnas_0605814103_9.pdf [file pnas_0605814103_9.pdf]

**Table 2. Mitochondrial reduced glutathione and oxidized glutathione content in NSC-34 cell lines expressing mutant SOD1s or wild-type SOD1**

|            | SOD1 protein | Mitochondrial GSH content (nmoli/mg protein) | Mitochondrial GSSG content (nmoli/mg protein) |
|------------|--------------|----------------------------------------------|-----------------------------------------------|
| hSOD1 -myc | WT -Doxy     | 36.30 ± 4.5                                  | 4.60 ± 0.2                                    |
|            | WT +Doxy     | 34.60 ± 5.5                                  | 4.70 ± 0.5                                    |
|            | G93A-Doxy    | 43.00 ± 5.7                                  | 8.50 ± 0.4                                    |
|            | G93A+Doxy    | 47.00 ± 3.7                                  | 30.00 ± 2.6                                   |
|            | WT -Doxy     | 46.00 ± 4.0                                  | 8.50 ± 0.7                                    |
|            | WT +Doxy     | 50.00 ± 3.8                                  | 9.40 ± 0.6                                    |
|            | A4V -Doxy    | 72.40 ± 3.1                                  | 27.80 ± 2.9                                   |
|            | A4V +Doxy    | 49.08 ± 4.0                                  | 152.86 ± 20.0                                 |
|            | G37R -Doxy   | 25.67 ± 3.0                                  | 4.96 ± 0.3                                    |
|            | G37R +Doxy   | 19.00 ± 2.0                                  | 22.50 ± 2.9                                   |
|            | H46R -Doxy   | 18.55 ± 2.0                                  | 4.44 ± 0.3                                    |
|            | H46R +Doxy   | 37.69 ± 3.0                                  | 8.74 ± 0.8                                    |
|            | H48Q -Doxy   | 24.00 ± 3.0                                  | 7.00 ± 0.6                                    |
|            | H48Q +Doxy   | 13.60 ± 1.8                                  | 5.70 ± 0.2                                    |
|            | H80R -Doxy   | 10.32 ± 1.4                                  | 2.65 ± 0.2                                    |
|            | H80R +Doxy   | 17.02 ± 1.8                                  | 244.26 ± 22.0                                 |
|            | G85R -Doxy   | 47.96 ± 5.0                                  | 21.01 ± 1.9                                   |
|            | G85R +Doxy   | 37.33 ± 4.0                                  | 65.35 ± 3.9                                   |
|            | D90A -Doxy   | 18.20 ± 2.0                                  | 7.10 ± 0.6                                    |
|            | D90A +Doxy   | 26.50 ± 3.0                                  | 13.25 ± 1.9                                   |
|            | G93A -Doxy   | 26.15 ± 3.2                                  | 3.37 ± 0.3                                    |
|            | G93A +Doxy   | 18.99 ± 2.2                                  | 9.70 ± 0.7                                    |
|            | D124V -Doxy  | 25.44 ± 3.3                                  | 9.40 ± 0.8                                    |
|            | D124V +Doxy  | 14.90 ± 2.0                                  | 18.00 ± 1.4                                   |
|            | D125H -Doxy  | 10.40 ± 2.1                                  | 1.10 ± 0.1                                    |
|            | D125H +Doxy  | 13.00 ± 1.9                                  | 6.10 ± 0.6                                    |
|            | E133Δ -Doxy  | 28.06 ± 2.2                                  | 10.10 ± 1.1                                   |
|            | E133Δ +Doxy  | 27.10 ± 2.8                                  | 20.10 ± 1.2                                   |
|            | S134N -Doxy  | 23.58 ± 3.0                                  | 5.12 ± 0.5                                    |
|            | S134N +Doxy  | 24.00 ± 2.4                                  | 23.00 ± 2.0                                   |
