# Supplementary material
Source: PubMed Central journal article supplement (PMC1564206)
Supplement: pnas_0605814103_10.pdf [file pnas_0605814103_10.pdf]

**Table 3. Properties of wild-type SOD1 and mutant SOD1 proteins used in this study**

| SOD1 protein | In-gel SOD activity | MP modification | Folding |
|--------------|---------------------|-----------------|---------|
| WT-myc       | +                   | MP1             | D/M     |
| A4V-myc      | +                   | MP1             | D/M     |
| G37R-myc     | +                   | MP1             | D/M     |
| H46R-myc     | -                   | MP1 MP2         | M       |
| H48Q-myc     | -                   | MP1 MP2         | M       |
| H80R-myc     | -                   | MP1 MP2         | M       |
| G85R-myc     | -                   | MP1 MP2         | M       |
| D90A-myc     | +                   | MP1             | D/M     |
| G93A-myc     | +                   | MP1             | D/M     |
| D124V-myc    | -                   | MP1 MP2         | M       |
| D125H-myc    | -                   | MP1 MP2         | M       |
| E133Δ-myc    | +                   | MP1             | D/M     |
| S134N-myc    | -                   | MP1 MP2         | M       |
| WT           | +                   | MP1             | ND      |
| G93A         | +                   | MP1             | ND      |

SOD activity as determined by an in-gel assay is indicated as + (comparable with wild-type SOD1) or – (diminished or absent). In MP modifications, SOD1 mobility shifts corresponding to the binding of 1 or 2 malPEG to Cys residues are indicated as MP<sub>1</sub> and MP<sub>2</sub>, respectively. “Folding” refers to the presence of SOD1 dimers (D) and/or monomers (M) in denaturing (0.1% SDS), nonreducing PAGE. A4V SOD1 mutant shows an intermediate behavior, running essentially as a monomer that displays SOD activity. ND, not detectable with an anti-SOD1 antibody.
