# Supplementary material
Source: PubMed Central journal article supplement (PMC1564206)

WT

G93A

-

+

-

+

Doxy

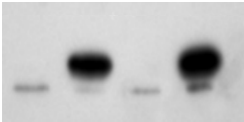

- *hSOD1*

- *mSOD1*

Supplement: pnas_0605814103_1.pdf [file pnas_0605814103_1.pdf]

# *hSOD-myc*

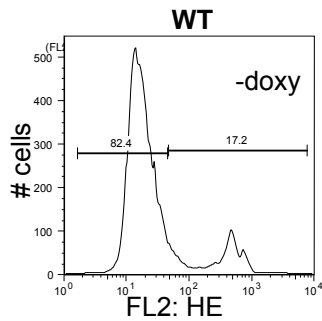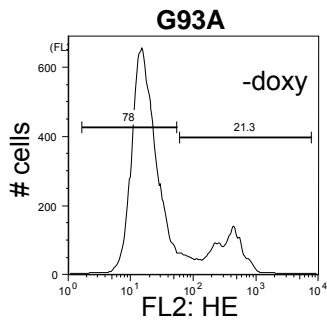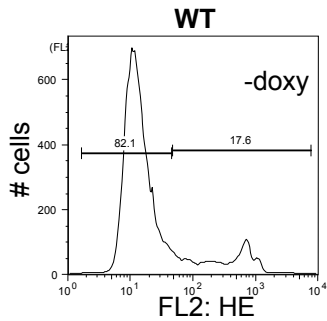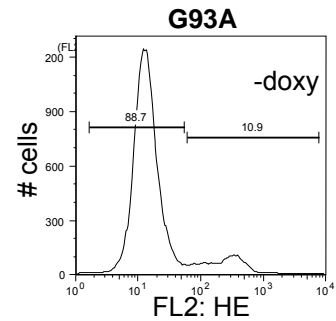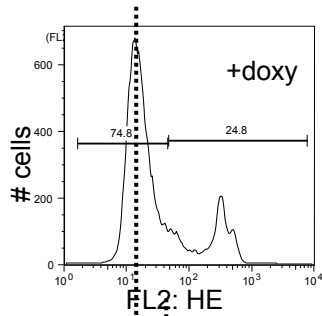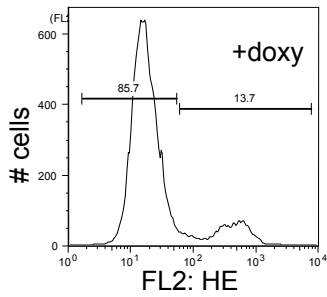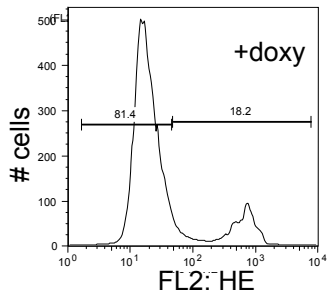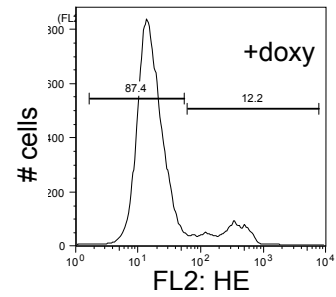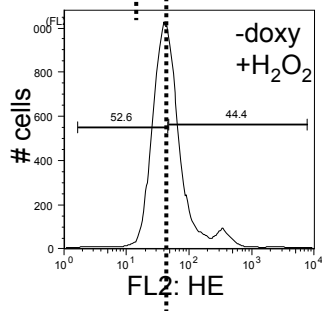

Supplement: pnas_0605814103_2.pdf [file pnas_0605814103_2.pdf]

*hSOD1*

*hSOD1-myc*

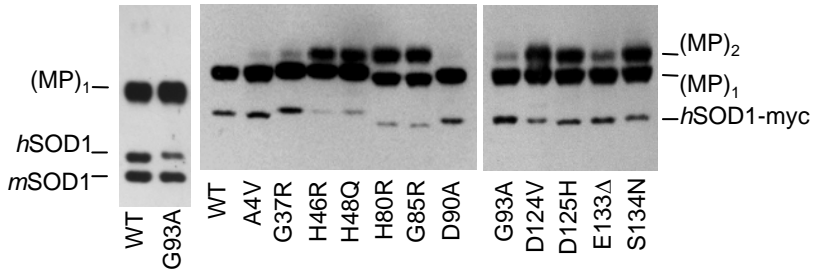

Supplement: pnas_0605814103_3.pdf [file pnas_0605814103_3.pdf]

malPEG

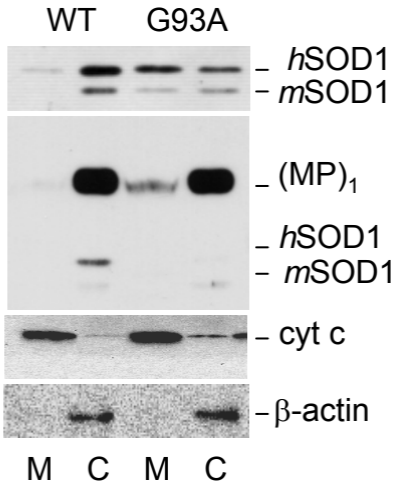

Supplement: pnas_0605814103_4.pdf [file pnas_0605814103_4.pdf]

**A**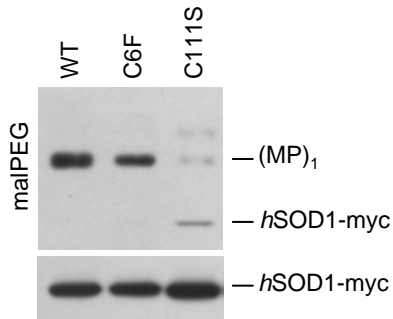**B**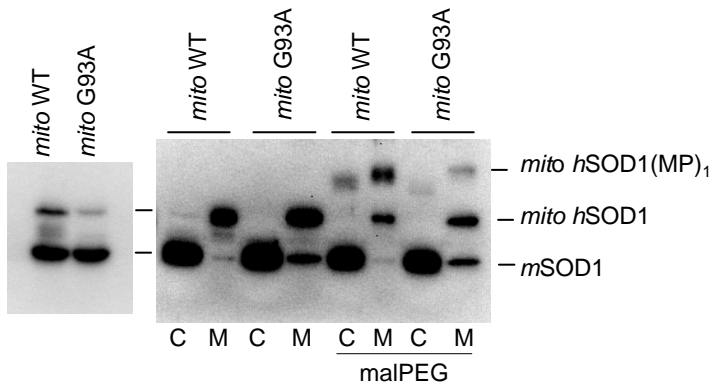

Supplement: pnas_0605814103_5.pdf [file pnas_0605814103_5.pdf]

# A

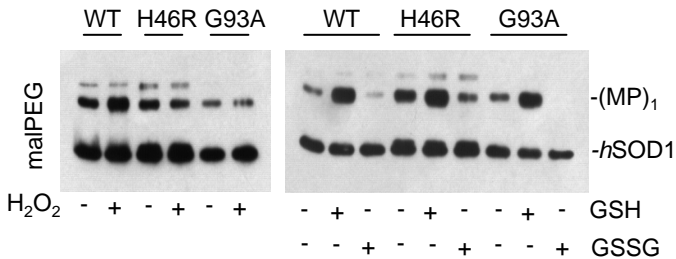

# B

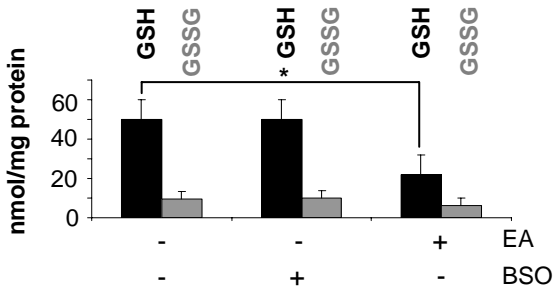

Supplement: pnas_0605814103_6.pdf [file pnas_0605814103_6.pdf]

**A**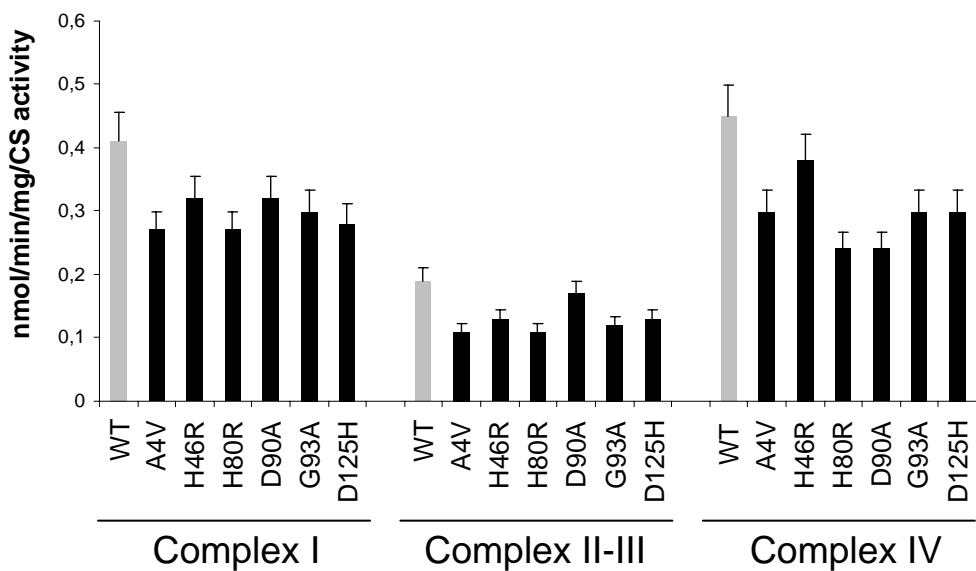**B**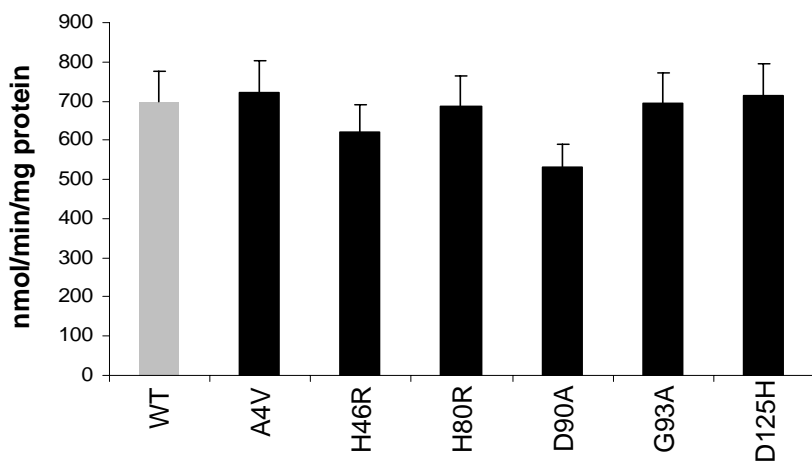**C**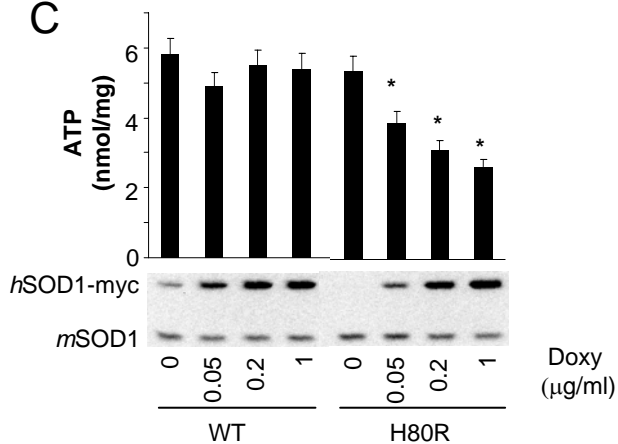

Supplement: pnas_0605814103_7.pdf [file pnas_0605814103_7.pdf]
